# Supplementary material for: Revealing the excited-state dynamics of cytidine and the role of excited-state proton transfer process
Source: Royal Society of Chemistry journal article supplement (doi:10.1039/d3cp03683a), 2023-01-01
Supplement: d3cp03683a1.pdf [file d3cp03683a1.pdf]

Supplementary Information for

**Revealing the Excited-state Dynamics of Cytidine and the Role of  
Excited-state Proton Transfer Process**

Li Zhao<sup>1,\*</sup>, Xuehui Geng<sup>1</sup>, Guoxia Han<sup>1</sup>, Yahui Guo<sup>1</sup>, Runze Liu<sup>2</sup>, Junsheng Chen<sup>3,\*</sup>

<sup>1</sup>College of Science, China University of Petroleum (East China), Qingdao 266580,  
Shandong, China

<sup>2</sup>Institute of Molecular Sciences and Engineering, Shandong University, Qingdao  
266235, P. R. China.

<sup>3</sup>Nano-Science Center & Department of Chemistry University of Copenhagen  
Universitetsparken 5, 2100 KøbenhavnØ (Denmark)

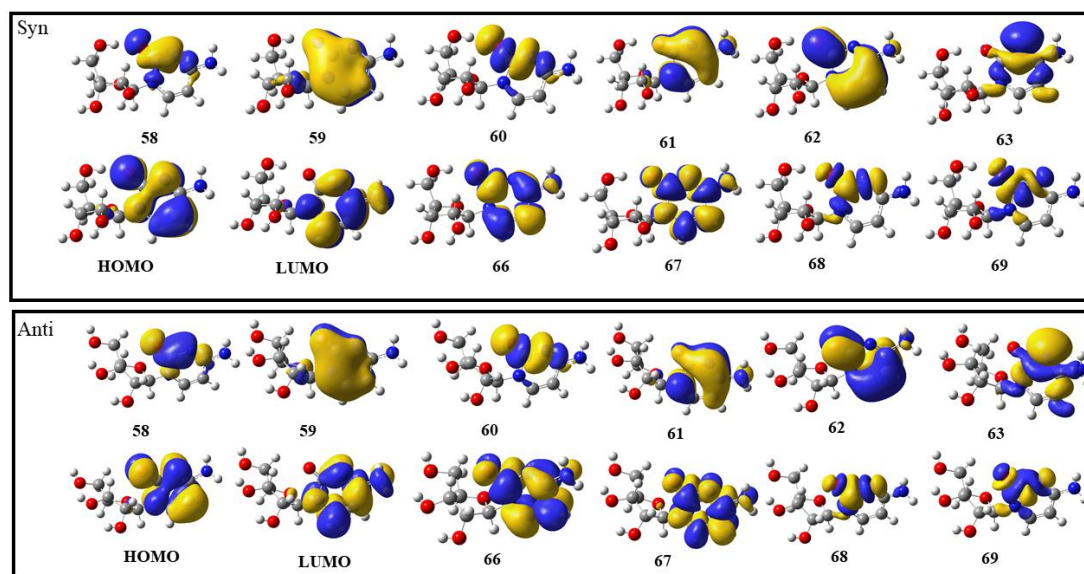

**Figure S1** The active spaces included in SA3-CASSCF(14,12) calculation level for the most stable ground-state conformation of cytidine system.

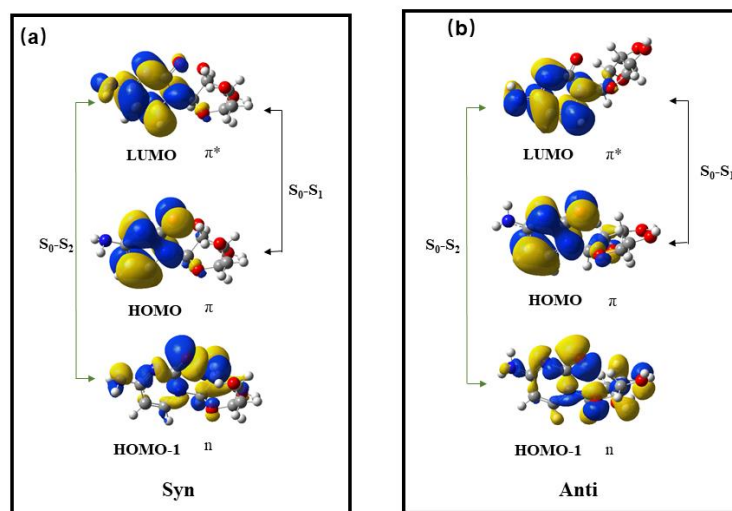

**Figure S2** Orbitals and orbital promotions involved in forming the first two excited singlet states of cytidine system calculated at the SA3-CASSCF(14,12)// 6-31G\* level of theory.

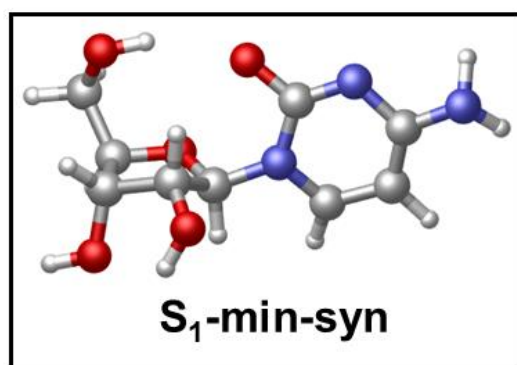

**Figure S3** The stable structure of syn-Cyd in the  $S_1$  state calculated at the SA3-CASSCF(14,12)// 6-31G\* level of theory.

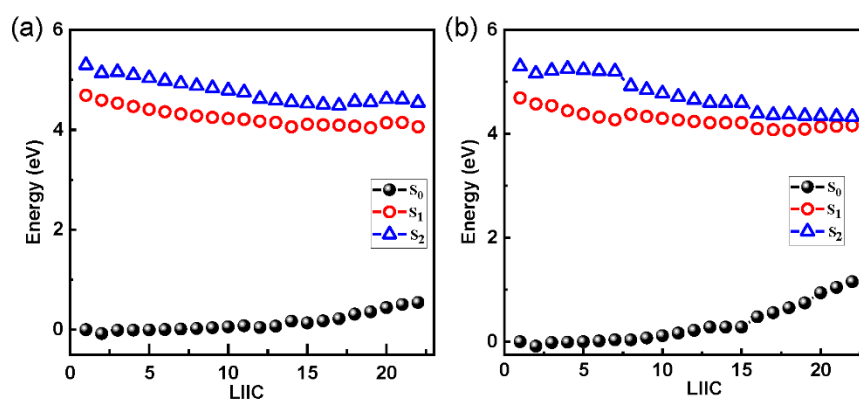

**Figure S4** The energy profiles constructed by LIIC method connecting the FC point and Syn-CI<sub>S2/S1</sub> (a), Syn-CI<sub>S2/S1-B</sub> (b) at CASPT2 level.

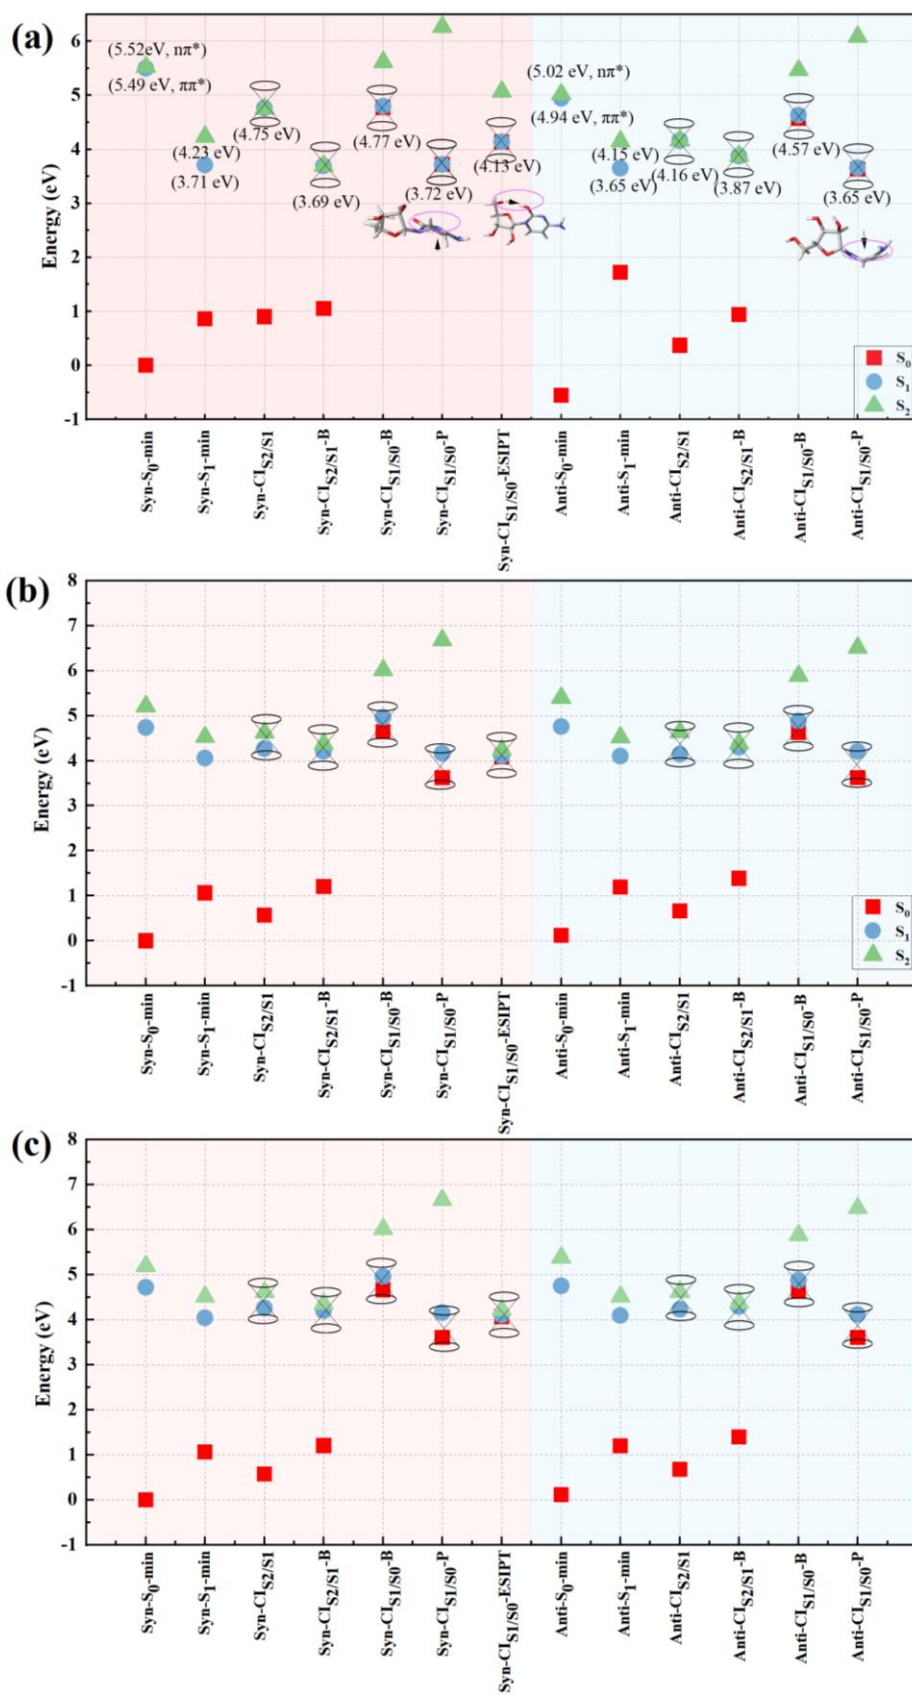

**Figure S5** The energy information of critical points calculated at (a) SA3-CASSCF(14,12)/6-31G\*, (b) CASPT2/SA3-CASSCF(14,12)/6-31G\* level, and (c) CASPT2/SA3-CASSCF(14,12)/6-31G\*\* level.

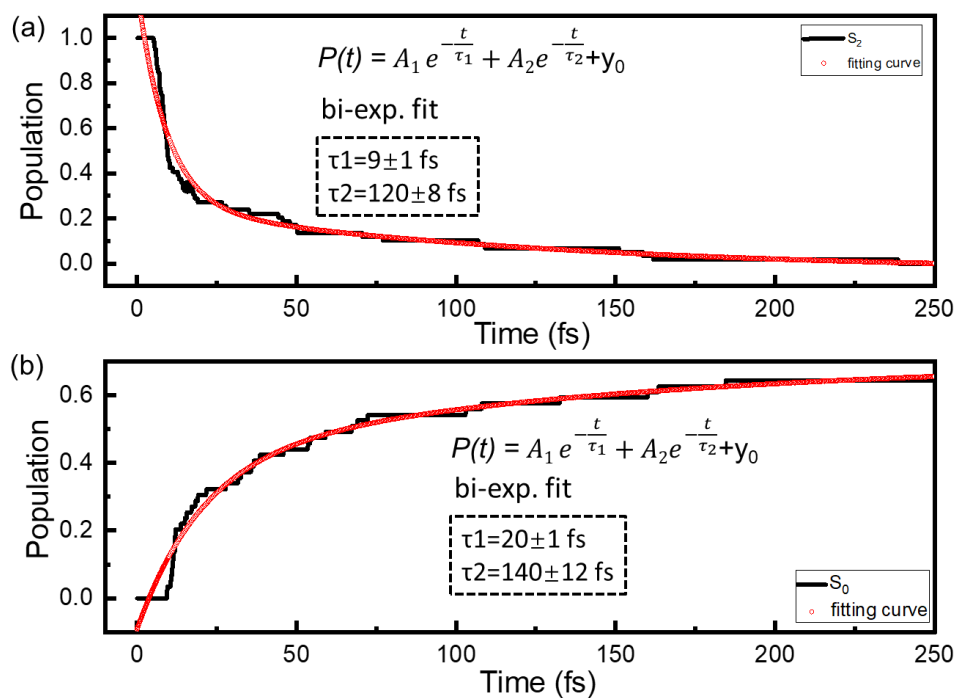

**Figure S6** The time-dependent population of the  $S_2$  (a) and  $S_0$  (b) together with bi-exponential fitting curves.

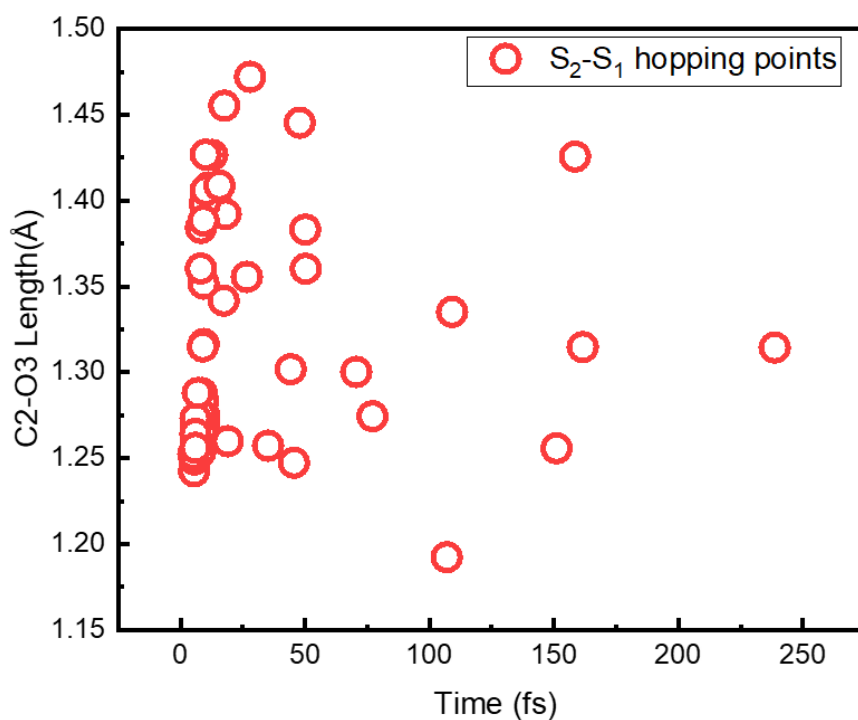

**Figure S7** The C2-O3 bond lengths (ordinate) and the decay times for all  $S_2$ - $S_1$  hopping points (abscissa).

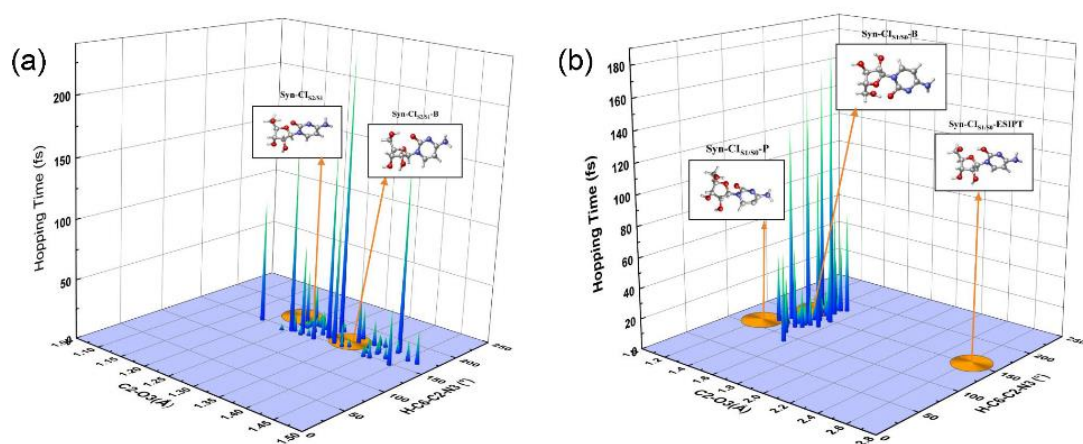

**Figure S8** Geometric distribution at the  $S_2 \rightarrow S_1$  (a) and  $S_1 \rightarrow S_0$  hopping events (b) as functions of bond length of C2-O3 and dihedral angles of H-C6-C2-N3. Bars: hopping events; The height of each bar represents hopping time of each trajectory.

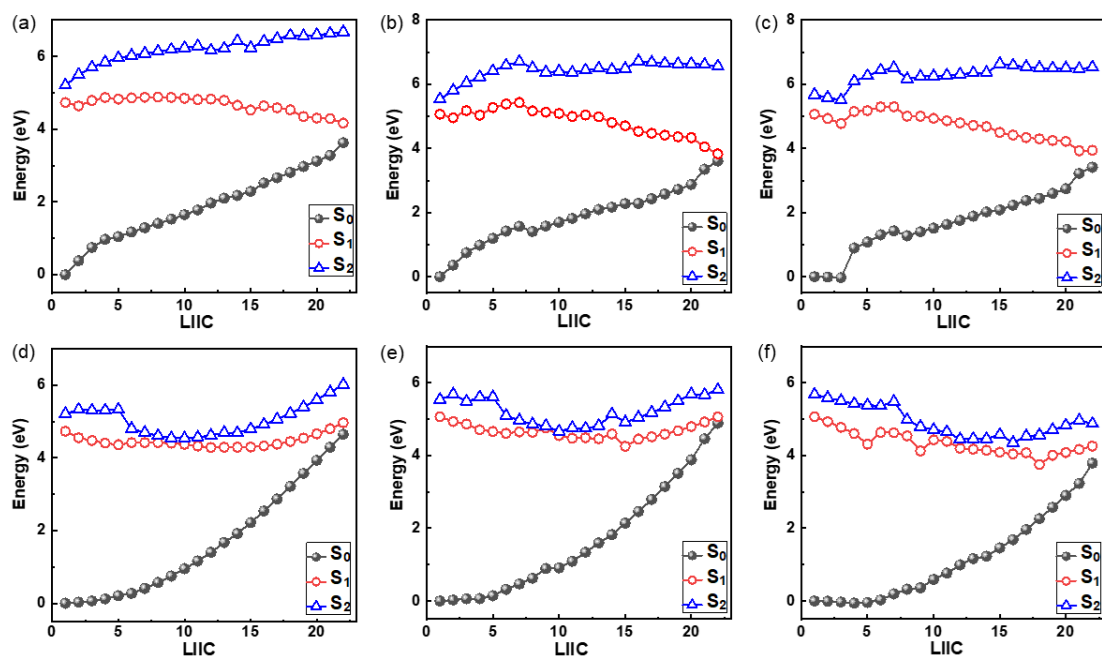

**Figure S9** The energy profiles constructed by LIIC method connecting the FC point and Syn-CI $_{S_1/S_0}$ -P (a) gas phase, (b) PCM model and (c) an explicit water molecule model; and Syn-CI $_{S_1/S_0}$ -B (d) gas phase, (e) PCM model and (f) an explicit water molecule model at CASPT2 level.

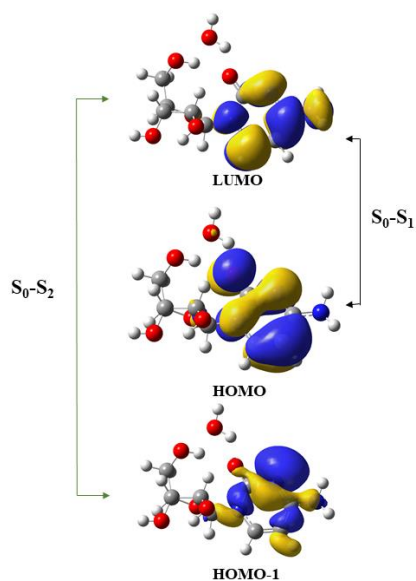

**Figure S10** Orbitals and orbital promotions involved in forming the first two excited singlet states of Cyd-H<sub>2</sub>O cluster system calculated at the SA3-CASSCF(14,12)/6-31G\* level of theory.

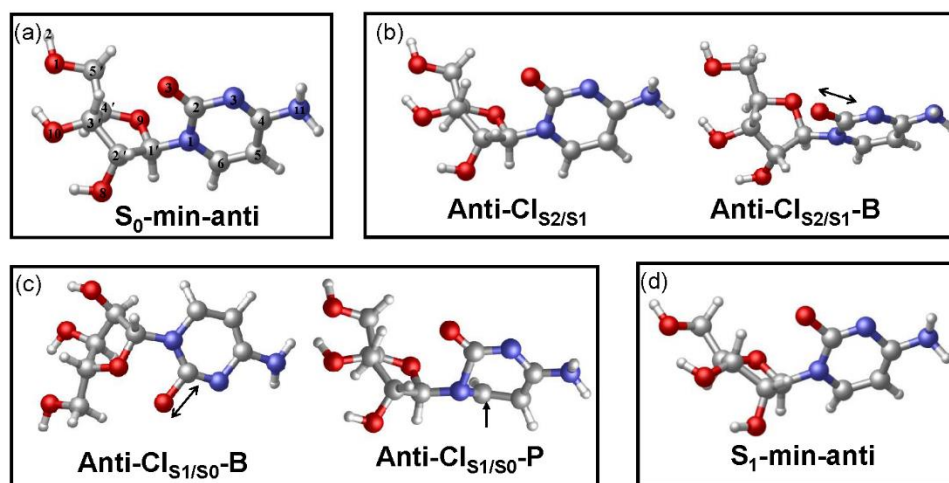

**Figure S11** Optimized structures: (a) ground state structure of Anti-Cyd with atom numbering, (b) two MECIs located between S<sub>2</sub> and S<sub>1</sub>, (c) two MECIs located between S<sub>1</sub> and S<sub>0</sub> states, and (d) stable structure in the S<sub>1</sub> state obtained at the SA3-CASSCF(14,12)/6-31G\* level. Red for O atom, blue for N atom, grey for C atom, and white for H atom.

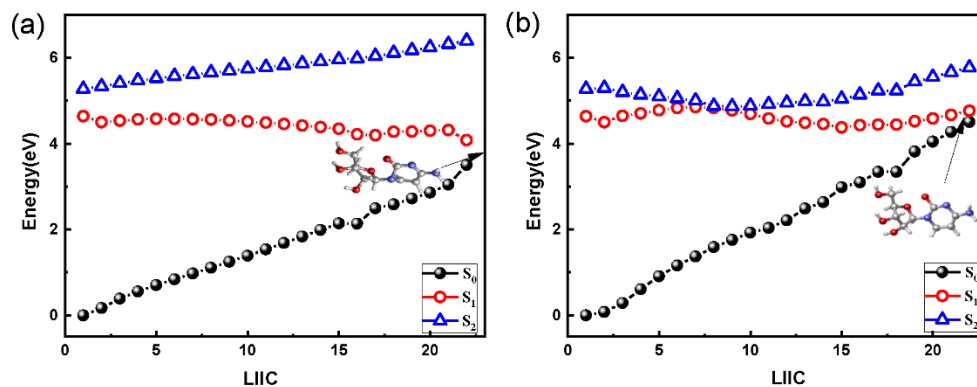

**Figure S12** The energy profiles constructed by LIIC method connecting the FC point and Anti- $CI_{S1/S0}$ -P (a);  $CI_{S1/S0}$ -B (b) at CASPT2 level.

**Table S1** The absolute ground state energy (in hartree) of syn-, anti-, north-, and south-Cyd conformer optimized at the SA3-CASSCF(14,12)/6-31G\* level.

| Conformer | Energy            |
|-----------|-------------------|
| syn       | -886.197104348686 |
| anti      | -886.154693719031 |
| north     | -886.150859721237 |
| south     | -886.147484992092 |

**Table S2** The vertical excitation energies (in eV) of anti-Cyd to the two lowest singlet excited states calculated at the CASPT2 level.

| Geo. | State           | CASPT2/gas |
|------|-----------------|------------|
| anti | $S_1(\pi\pi^*)$ | 4.64       |
|      | $S_2(n\pi^*)$   | 5.27       |

**Table S3** Cartesian coordinates of  $S_0$ -min of syn (left) and anti (right) conformer of cytidine system optimized at SA3-CASSCF(14,12)/6-31G\* level.

| SA3-CASSCF(14,12)/6-31G* |   |   | SA3-CASSCF(14,12)/6-31G* |   |   |
|--------------------------|---|---|--------------------------|---|---|
| X                        | Y | Z | X                        | Y | Z |
|                          |   |   |                          |   |   |

|   |               |               |               |   |               |               |               |
|---|---------------|---------------|---------------|---|---------------|---------------|---------------|
| C | 0.4530500396  | -1.8617032003 | -2.2101179713 | C | 0.4856045960  | 2.1362429903  | -1.1238627321 |
| C | 0.6390579298  | -2.7705292681 | -0.9857243300 | C | -0.7011271631 | 1.9495856719  | -0.1792309838 |
| C | 0.6166776396  | -1.7862929118 | 0.1835654404  | C | -1.2390462039 | 0.5803899018  | -0.5996259319 |
| C | 1.2530493487  | -0.5563089734 | -0.4696496883 | C | -0.0090405265 | -0.1105848922 | -1.2223761787 |
| O | 0.8212755308  | -0.5550277888 | -1.7889780039 | O | 1.0051090611  | 0.8451576556  | -1.3198323188 |
| O | 1.9198728779  | -3.3660863287 | -0.9663608389 | O | -1.6946581276 | 2.9214581559  | -0.3328522049 |
| O | 1.3021864982  | -2.2125823701 | 1.3129759729  | O | -2.1868358624 | 0.7039503322  | -1.6221061959 |
| C | -0.9640327855 | -1.8398749121 | -2.7584868185 | C | 1.5745223123  | 3.0240076135  | -0.5636169707 |
| O | -1.9309465393 | -1.7227361477 | -1.7648041537 | O | 0.9621598254  | 4.2663140290  | -0.2985371544 |
| H | -1.8628720175 | -0.8681108080 | -1.3487518898 | H | 1.5772178235  | 4.8493820902  | 0.1237596134  |
| H | 1.9555366322  | -4.0977008295 | -1.5669811798 | H | -1.2994628489 | 3.7746405062  | -0.1956090672 |
| H | -0.1330217869 | -3.5238340434 | -0.9061784541 | H | -0.3586279046 | 1.9054649557  | 0.8433811398  |
| H | -0.4013116208 | -1.5787355687 | 0.4637481940  | H | -1.6472189081 | 0.0221086113  | 0.2316663911  |
| H | 2.3287644271  | -0.6752078408 | -0.4292238657 | H | -0.2987568543 | -0.4358605569 | -2.2100199471 |
| H | 1.1353071774  | -2.1634555516 | -2.9988198902 | H | 0.1252527243  | 2.5456202697  | -2.0639535116 |
| H | 2.0012589851  | -2.7928731124 | 1.0340161742  | H | -2.6779540884 | 1.5040981435  | -1.4725585788 |
| H | -1.0384872728 | -1.0395648766 | -3.4901480680 | H | 1.9673816409  | 2.5761993229  | 0.3431292640  |
| H | -1.1538458064 | -2.7763551224 | -3.2719218523 | H | 2.3845086586  | 3.1322713620  | -1.2782586545 |
| C | 2.0257436812  | 1.4713027762  | 0.6271932384  | C | 0.7486610755  | -2.4222794517 | -1.2760768725 |
| C | -0.3265653728 | 1.2209052179  | 0.2306362109  | C | 0.8701924489  | -1.2228151733 | 0.7957864657  |
| C | 1.8372835106  | 2.6779831070  | 1.1976595672  | C | 1.3023503263  | -3.5140834758 | -0.7119140627 |
| H | 2.9969422941  | 1.0358276984  | 0.5119970492  | H | 0.4756627677  | -2.3834859432 | -2.3110548671 |
| C | 0.4773974643  | 3.1441074869  | 1.2800272445  | C | 1.6298350055  | -3.4245134535 | 0.6920017941  |
| H | 2.6593701549  | 3.2698130280  | 1.5465582250  | H | 1.5111329450  | -4.3968081322 | -1.2824038229 |
| N | 0.9752018413  | 0.7268491633  | 0.1566015561  | N | 0.4986662415  | -1.2906215400 | -0.5449875870 |
| O | -1.2651776661 | 0.5963619581  | -0.1912583088 | O | 0.6906725932  | -0.1973287344 | 1.4399308233  |
| N | -0.5292395218 | 2.4771556261  | 0.8401888568  | N | 1.4259172061  | -2.3681651771 | 1.4013020405  |
| N | 0.2474863527  | 4.4260050439  | 1.8177628786  | N | 2.2294374952  | -4.5101940934 | 1.2911504061  |
| H | -0.7211951056 | 4.5812624057  | 2.0056526249  | H | 2.2611818472  | -4.4550174510 | 2.2864511507  |
| H | 0.8200227098  | 4.6465440430  | 2.6052291799  | H | 1.9625411637  | -5.4074131069 | 0.9505552939  |

**Table S4** Cartesian coordinates of S<sub>1</sub>-min of syn (left) and anti (right) of cytidine system optimized at SA3-CASSCF(14,12)/6-31G\* level.

| SA3-CASSCF(14,12)/6-31G* |              |               |               | SA3-CASSCF(14,12)/6-31G* |               |               |               |
|--------------------------|--------------|---------------|---------------|--------------------------|---------------|---------------|---------------|
|                          | X            | Y             | Z             |                          | X             | Y             | Z             |
| C                        | 0.4704641050 | -1.9163806925 | -2.2025778687 | C                        | 0.5111243160  | 2.1454400739  | -1.0852128279 |
| C                        | 0.6004316228 | -2.7604880549 | -0.9220058209 | C                        | -0.7055402534 | 1.9842253370  | -0.1757680506 |
| C                        | 0.5276339147 | -1.7178248862 | 0.1949267667  | C                        | -1.2334477370 | 0.6071679714  | -0.5905375945 |
| C                        | 1.1762138191 | -0.5173233823 | -0.5028370543 | C                        | 0.0193690589  | -0.0913247178 | -1.1672766657 |
| O                        | 0.7085151145 | -0.5702938967 | -1.8172639776 | O                        | 1.0518288124  | 0.8518490849  | -1.1799887987 |
| O                        | 1.8742532552 | -3.3587733806 | -0.8174969793 | O                        | -1.6914253219 | 2.9528416933  | -0.3710597610 |
| O                        | 1.1600217147 | -2.0858926523 | 1.3697749947  | O                        | -2.1506184365 | 0.7170656582  | -1.6389651735 |



|   |               |               |               |   |               |               |               |
|---|---------------|---------------|---------------|---|---------------|---------------|---------------|
| C | -0.8917121292 | -1.9960349196 | -2.8665487527 | C | 1.5674005132  | 3.0830506207  | -0.5437528463 |
| O | -1.9363432537 | -1.7940722744 | -1.9641428682 | O | 0.9223282070  | 4.3213323449  | -0.3519944082 |
| H | -1.9162659170 | -0.8979793092 | -1.6521245009 | H | 1.5261201045  | 4.9525923573  | 0.0138342730  |
| H | 1.9206568188  | -4.1420628282 | -1.3480570527 | H | -1.2937141792 | 3.8100893869  | -0.2688879283 |
| H | -0.1782416843 | -3.5066986321 | -0.8367677608 | H | -0.3900239126 | 1.9602284070  | 0.8582340981  |
| H | -0.5035156295 | -1.5038594972 | 0.4199509898  | H | -1.6662480965 | 0.0584838719  | 0.2346821119  |
| H | 2.2488783902  | -0.6593204082 | -0.4832477873 | H | -0.2242914750 | -0.3789248046 | -2.1774951654 |
| H | 1.2358934061  | -2.2151651162 | -2.9123688148 | H | 0.1776807520  | 2.4921677348  | -2.0598193995 |
| H | 1.8905741867  | -2.6533812934 | 1.1521728529  | H | -2.6457379427 | 1.5195805493  | -1.5172793624 |
| H | -0.9273010426 | -1.2806265191 | -3.6835053029 | H | 1.9509052373  | 2.6903277460  | 0.3925985517  |
| H | -1.0287211048 | -2.9862719925 | -3.2852299363 | H | 2.3911308621  | 3.1738376244  | -1.2443314120 |
| C | 2.0637363387  | 1.5789072066  | 0.3701435975  | C | 0.6456551066  | -2.4468058974 | -1.2875859079 |
| C | -0.2872129690 | 1.3623701905  | 0.2980638055  | C | 0.8911148042  | -1.3686743982 | 0.7930001680  |
| C | 1.8734519329  | 2.7270968551  | 1.2005115750  | C | 1.2529846649  | -3.6008129341 | -0.6889788680 |
| H | 2.9781906280  | 1.3588107871  | -0.1389484029 | H | 0.3388025935  | -2.4037596698 | -2.3086442575 |
| C | 0.6066511903  | 3.0823695874  | 1.5437687579  | C | 1.6524583462  | -3.5419562954 | 0.6045699733  |
| H | 2.7334220008  | 3.2647262156  | 1.5540751384  | H | 1.4059154001  | -4.4757098818 | -1.2919356389 |
| N | 0.9607569292  | 0.7881067923  | 0.0847871495  | N | 0.4744602066  | -1.3116336295 | -0.5192832104 |
| O | -1.2733880988 | 0.7104444032  | -0.3064597338 | O | 0.6368392295  | -0.2349532487 | 1.4628982761  |
| N | -0.4999873302 | 2.4443014822  | 0.9503061552  | N | 1.4387454609  | -2.3854917677 | 1.3920682897  |
| N | 0.2485048251  | 4.0749509482  | 2.4530849181  | N | 2.3417377163  | -4.5344747515 | 1.2926584168  |
| H | -0.6388120849 | 4.4763211791  | 2.2318151821  | H | 2.1762736616  | -4.4913150571 | 2.2763322876  |
| H | 0.9420406509  | 4.7811819885  | 2.5826078306  | H | 2.2034515712  | -5.4567229780 | 0.9381575705  |

**Table S5** Cartesian coordinates of Syn-Cl<sub>S2/S1</sub> (left) and Syn-Cl<sub>S2/S1</sub>-B (right) of cytidine optimized at SA3-CASSCF(14,12)/6-31G\* level.

| SA3-CASSCF(14,12)/6-31G* |               |               |               | SA3-CASSCF(14,12)/6-31G* |               |               |               |
|--------------------------|---------------|---------------|---------------|--------------------------|---------------|---------------|---------------|
|                          | X             | Y             | Z             |                          | X             | Y             | Z             |
| H                        | 13.0158775981 | 17.2403903167 | 12.2649516255 | C                        | 0.3959708110  | -1.8721424410 | -2.1513259738 |
| O                        | 13.0688543663 | 18.0280733842 | 12.7961726862 | C                        | 0.5930921667  | -2.7846120576 | -0.9265337390 |
| C                        | 12.0505086811 | 18.0239174570 | 13.7465004571 | C                        | 0.5444125702  | -1.8067466725 | 0.2486330468  |
| H                        | 11.0698978961 | 17.9485070906 | 13.2835684718 | C                        | 1.1335779221  | -0.5540783743 | -0.4063074200 |
| H                        | 12.1002957332 | 18.9760878324 | 14.2629758976 | O                        | 0.6101364570  | -0.5435055909 | -1.6966569225 |
| C                        | 12.1967938278 | 16.9023475984 | 14.7582731878 | O                        | 1.8808323935  | -3.3605563445 | -0.9032602463 |
| H                        | 11.4955647689 | 17.0508710544 | 15.5736290701 | O                        | 1.2373486274  | -2.2196296171 | 1.3744118429  |
| O                        | 11.9037909048 | 15.6645529954 | 14.1310825781 | C                        | -0.9844499581 | -1.9552708005 | -2.7756262060 |
| C                        | 12.9216065237 | 14.7393360504 | 14.3432743853 | O                        | -2.0040333964 | -1.8444545808 | -1.8298097991 |
| H                        | 12.7291488695 | 14.1730457314 | 15.2459649892 | H                        | -2.0151395474 | -0.9626547037 | -1.4790693875 |
| N                        | 12.9520027507 | 13.7579732171 | 13.2786696564 | H                        | 1.9254869023  | -4.1056447430 | -1.4864957335 |
| C                        | 12.6986095791 | 12.4237663748 | 13.5655585263 | H                        | -0.1675579065 | -3.5504428618 | -0.8546061676 |
| H                        | 12.5643467920 | 12.1743739287 | 14.5947308340 | H                        | -0.4814341931 | -1.6307831970 | 0.5282008794  |
| C                        | 12.6526916031 | 11.4480873072 | 12.5348508307 | H                        | 2.2089634993  | -0.6653572745 | -0.4421904406 |

|   |               |               |               |   |               |               |               |
|---|---------------|---------------|---------------|---|---------------|---------------|---------------|
| H | 12.4893703107 | 10.4205434419 | 12.7994370541 | H | 1.1456707468  | -2.1061294592 | -2.9009594837 |
| C | 12.8211899812 | 11.8238922250 | 11.2349403594 | H | 1.9538443203  | -2.7787183799 | 1.0961668531  |
| N | 12.9145962395 | 11.0081859989 | 10.1081891734 | H | -1.0694642143 | -1.1926006603 | -3.5445758671 |
| H | 12.4628973030 | 11.4087921738 | 9.3105926768  | H | -1.1034434684 | -2.9218228407 | -3.2512950069 |
| H | 12.5711728446 | 10.0847104030 | 10.2703487424 | C | 2.0160294481  | 1.4249991397  | 0.7166929375  |
| N | 13.0360517340 | 13.1859292598 | 10.9946901830 | C | -0.3183002353 | 1.3136106075  | 0.3946787841  |
| C | 13.1009127324 | 14.1474125526 | 11.8999090837 | C | 1.8001457846  | 2.6784371639  | 1.3666148818  |
| O | 13.2855094798 | 15.3319600209 | 11.6333920642 | H | 2.9454346075  | 0.9008226560  | 0.7473162397  |
| C | 13.6445041818 | 16.7537083553 | 15.3394418616 | C | 0.5426105714  | 3.1818282130  | 1.4391609104  |
| H | 14.2358247941 | 17.6492487481 | 15.2047503396 | H | 2.6470170093  | 3.2131826603  | 1.7534044638  |
| C | 14.1966199433 | 15.5605486941 | 14.5618018519 | N | 0.9073311912  | 0.7160941145  | 0.2609231012  |
| H | 14.5901438679 | 15.8936169001 | 13.6169684326 | O | -1.3418406721 | 0.5743515370  | -0.0793080493 |
| O | 15.1910161243 | 14.8541685647 | 15.2221407793 | N | -0.5675682266 | 2.4744137548  | 0.9296814129  |
| H | 15.0422967716 | 14.9337304130 | 16.1573115678 | N | 0.1946831179  | 4.4315814092  | 1.9429047012  |
| O | 13.6208898821 | 16.3658544952 | 16.6952360412 | H | -0.7466593415 | 4.4504412154  | 2.2752340876  |
| H | 13.4439597553 | 17.1108155251 | 17.2527119528 | H | 0.8287795929  | 4.7931335079  | 2.6231495004  |

**Table S6** Cartesian coordinates of syn-Cl<sub>S1/S0</sub>-B (left) and syn-Cl<sub>S1/S0</sub>-P (right) of cytidine optimized at SA3-CASSCF(14,12)/6-31G\* level.

| SA3-CASSCF(14,12)/6-31G* |               |               |               | SA3-CASSCF(14,12)/6-31G* |               |               |               |
|--------------------------|---------------|---------------|---------------|--------------------------|---------------|---------------|---------------|
|                          | X             | Y             | Z             |                          | X             | Y             | Z             |
| C                        | 0.2986235243  | -1.8428308529 | -2.0913500815 | C                        | -0.0105932303 | -0.0685174514 | -0.0025606098 |
| C                        | 0.8571099078  | -2.6754712445 | -0.9286633314 | C                        | 0.0190656562  | 0.0019645624  | 1.5617531476  |
| C                        | 1.1517846125  | -1.6286063034 | 0.1452536349  | C                        | 1.5157840420  | -0.0073358315 | 1.8693033768  |
| C                        | 1.5246188324  | -0.4033063652 | -0.7004575566 | C                        | 2.0281119064  | -0.8855300024 | 0.7252707149  |
| O                        | 0.6960892306  | -0.4986792912 | -1.8255750993 | O                        | 1.2615199681  | -0.5744372739 | -0.3851134931 |
| O                        | 2.0941307838  | -3.2629377136 | -1.2587420116 | O                        | -0.5051708631 | -1.1707585927 | 2.1412981210  |
| O                        | 2.1176851572  | -2.0124777871 | 1.0599355606  | O                        | 1.8527544251  | -0.5109179015 | 3.1178621271  |
| C                        | -1.2099665680 | -1.8997952180 | -2.2473570789 | C                        | -0.2485537704 | 1.2715196887  | -0.6751170027 |
| O                        | -1.8774693314 | -1.6076337423 | -1.0552015413 | O                        | 0.5174798935  | 2.2952577625  | -0.1227397867 |
| H                        | -1.9382394207 | -0.6671004670 | -0.9529295197 | H                        | 1.4347535664  | 2.1576323586  | -0.3336184466 |
| H                        | 1.9683601717  | -4.0690163795 | -1.7402992809 | H                        | -1.4522585923 | -1.1567588432 | 2.1326120625  |
| H                        | 0.1565066225  | -3.4250016152 | -0.5839500914 | H                        | -0.4803197060 | 0.8813313376  | 1.9438518101  |
| H                        | 0.2449952356  | -1.4065571032 | 0.6895775210  | H                        | 1.9070257361  | 0.9926590649  | 1.7910153814  |
| H                        | 2.5689963615  | -0.4435913325 | -0.9870149730 | H                        | 1.8870159662  | -1.9229514045 | 1.0041264998  |
| H                        | 0.7674100183  | -2.1466508761 | -3.0200438848 | H                        | -0.7677979242 | -0.7781060926 | -0.3196373143 |
| H                        | 2.7637940948  | -2.5446587451 | 0.6092317221  | H                        | 1.1885813240  | -1.1416238911 | 3.3729068692  |
| H                        | -1.5123420940 | -1.2284826315 | -3.0450289331 | H                        | -0.0651741337 | 1.1631761484  | -1.7405667786 |
| H                        | -1.4937416020 | -2.9047898928 | -2.5368916407 | H                        | -1.2879249880 | 1.5510548228  | -0.5443042652 |
| C                        | 2.1931946008  | 1.3882553144  | 0.8885360442  | C                        | 4.2988747577  | -1.7293735114 | 0.7542937942  |
| C                        | 0.1902986540  | 1.6250555637  | -0.3684260254 | C                        | 4.0643559365  | 0.5136500869  | 0.0793451349  |
| C                        | 1.6445884732  | 2.5746645605  | 1.6112332931  | C                        | 5.5866645634  | -1.7536466276 | 0.0938545016  |
| H                        | 2.6222607518  | 0.6032933340  | 1.4864627549  | H                        | 3.9969836776  | -2.3645604868 | 1.5656225793  |

|   |               |              |               |   |              |               |               |
|---|---------------|--------------|---------------|---|--------------|---------------|---------------|
| C | 0.5166904728  | 3.1617578655 | 1.2412340953  | C | 6.1684201986 | -0.4095977447 | 0.0674424202  |
| H | 2.2206226771  | 2.9615511557 | 2.4323633142  | H | 5.3748401251 | -1.9461177278 | -0.9594835963 |
| N | 1.2674262308  | 0.8733397050 | -0.0930766453 | N | 3.4508715246 | -0.7834881501 | 0.3864406820  |
| O | -0.5955100574 | 1.1474207941 | -1.5232570942 | O | 3.3141731382 | 1.4424645865  | -0.1720856042 |
| N | -0.2623203005 | 2.6530702061 | 0.1217232081  | N | 5.4215753489 | 0.6522402232  | 0.1776316901  |
| N | -0.0404847809 | 4.3459949703 | 1.7382658939  | N | 7.4803655949 | -0.2550530868 | -0.2050553325 |
| H | -1.0389521147 | 4.2981094706 | 1.7557550276  | H | 7.8486884030 | 0.6707280476  | -0.2098312462 |
| H | 0.3118169306  | 4.5908005804 | 2.6406016766  | H | 8.0879455550 | -0.9949176697 | 0.0598472632  |

**Table S7** Cartesian coordinates of syn-Cl<sub>SI</sub>/SO-ESIPT (left) and transition state (TS) structure (right) of cytidine optimized at SA3-CASSCF(14,12)/6-31G\* level.

| SA3-CASSCF(14,12)/6-31G* |               |               |               | SA3-CASSCF(14,12)/6-31G* |                 |                 |                 |
|--------------------------|---------------|---------------|---------------|--------------------------|-----------------|-----------------|-----------------|
|                          | X             | Y             | Z             |                          | X               | Y               | Z               |
| H                        | 12.2091789060 | 15.9898510732 | 12.1567433119 | C                        | 0.000000000000  | 0.000000000000  | 0.000000000000  |
| O                        | 13.0273160365 | 18.3484479971 | 12.9619097623 | C                        | 0.000000000000  | 0.000000000000  | 1.540177232885  |
| C                        | 12.1316355337 | 18.4041158598 | 14.0398726551 | C                        | 1.491349325263  | 0.000000000000  | 1.883379484915  |
| H                        | 11.1017235802 | 18.4855280341 | 13.7126257473 | C                        | 2.061264711150  | -0.785952318472 | 0.696902505421  |
| H                        | 12.3893284500 | 19.2375169129 | 14.6905004971 | O                        | 1.310116097764  | -0.334774850864 | -0.403181461019 |
| C                        | 12.2977642044 | 17.1131724999 | 14.8535174168 | O                        | -0.526226479400 | -1.203763181937 | 2.050555109799  |
| H                        | 11.6771992280 | 17.2100359580 | 15.7370260266 | O                        | 1.795115470974  | -0.549330783020 | 3.115984571090  |
| O                        | 11.8404965659 | 16.0205154286 | 14.0857785054 | C                        | -0.401742660358 | 1.328329700798  | -0.643376297065 |
| C                        | 12.6974517167 | 14.9105437368 | 14.2772371940 | O                        | 0.524716782218  | 2.299988918112  | -0.109820230686 |
| H                        | 12.4458354967 | 14.4201711503 | 15.2079798609 | H                        | 2.061229508691  | 1.741996593631  | -0.425414050428 |
| N                        | 12.5030334707 | 13.9373052203 | 13.2440776391 | H                        | -1.468481122010 | -1.159944675708 | 2.114975219770  |
| C                        | 12.4494227382 | 12.5703167073 | 13.6437587787 | H                        | -0.520537878478 | 0.852019629158  | 1.956653795496  |
| H                        | 11.9508179801 | 12.3722378398 | 14.5703628101 | H                        | 1.870128482838  | 1.010512452356  | 1.863691981422  |
| C                        | 12.7298851384 | 11.5975689285 | 12.6845791221 | H                        | 1.871921882527  | -1.839468377960 | 0.859222330017  |
| H                        | 12.6972656723 | 10.5601420509 | 12.9623633670 | H                        | -0.681900702953 | -0.762963715223 | -0.360605654533 |
| C                        | 13.0613276664 | 11.9879494367 | 11.4091237316 | H                        | 1.172917177620  | -1.241532287316 | 3.298906498443  |
| N                        | 13.5098060369 | 11.1283262771 | 10.4007675897 | H                        | -0.248651437743 | 1.259125190308  | -1.715384159181 |
| H                        | 13.3294097280 | 11.5120472537 | 9.4962763838  | H                        | -1.456686120441 | 1.494071225704  | -0.437790566463 |
| H                        | 13.1411909187 | 10.2026531094 | 10.4700741637 | C                        | 4.282909847732  | -1.781773869519 | 0.683379303563  |
| N                        | 13.0048043190 | 13.3270879771 | 11.0292175546 | C                        | 4.075913943901  | 0.557979856007  | 0.177543226387  |
| C                        | 12.7569886360 | 14.1949841747 | 11.9060339733 | C                        | 5.651030154393  | -1.616391944367 | 0.729672610386  |
| O                        | 12.7167777494 | 15.4707514697 | 11.5423010203 | H                        | 3.784109572085  | -2.624897096711 | 0.250766838083  |
| C                        | 13.7429256549 | 16.7817782030 | 15.2777763995 | C                        | 6.172853733557  | -0.335813950718 | 0.529373180052  |
| H                        | 14.4255564303 | 17.6046215536 | 15.1151624119 | H                        | 6.288284650695  | -2.459290771830 | 0.919433238735  |
| C                        | 14.0797571935 | 15.5609459759 | 14.4172987748 | N                        | 3.465264423825  | -0.664692700736 | 0.431281865162  |
| H                        | 14.4219649378 | 15.8824330209 | 13.4441639560 | O                        | 3.325190702767  | 1.561820535801  | -0.111692616959 |
| O                        | 15.0463261190 | 14.7338201838 | 14.9554204739 | N                        | 5.377191113110  | 0.719953708751  | 0.216819332790  |
| H                        | 14.9524334075 | 14.7326552104 | 15.9007966734 | N                        | 7.528524337911  | -0.049795007619 | 0.646310397582  |
| O                        | 13.7897657972 | 16.3548060841 | 16.6189460335 | H                        | 7.754336972430  | 0.853659928873  | 0.288088343649  |
| H                        | 13.9041306878 | 17.0897906724 | 17.2051481655 | H                        | 8.325921858561  | -0.647772697946 | 0.677425402274  |

**Table S8** Cartesian coordinates of anti-Cl<sub>S2/S1</sub> (left) and anti-Cl<sub>S2/S-B</sub> (right) of cytidine optimized at SA3-CASSCF(14,12)/6-31G\* level

| SA3-CASSCF(14,12)/6-31G* |               |               |               | SA3-CASSCF(14,12)/6-31G* |               |               |               |
|--------------------------|---------------|---------------|---------------|--------------------------|---------------|---------------|---------------|
|                          | X             | Y             | Z             |                          | X             | Y             | Z             |
| C                        | 0.4814836933  | 2.1432802267  | -1.1167363014 | C                        | 0.8627616388  | 2.0661635405  | -1.0460770917 |
| C                        | -0.7055126546 | 1.9738659890  | -0.1698893463 | C                        | -0.0947201364 | 2.1812433731  | 0.1375171812  |
| C                        | -1.2557407699 | 0.6086186329  | -0.5872179268 | C                        | -1.0688030413 | 1.0312393587  | -0.1365353169 |
| C                        | -0.0269613717 | -0.1015410544 | -1.1945151472 | C                        | -0.2314075828 | 0.0510066543  | -0.9956777272 |
| O                        | 0.9997528752  | 0.8483667671  | -1.2807884216 | O                        | 1.0057408593  | 0.6818849936  | -1.2240245886 |
| O                        | -1.6898028552 | 2.9546880867  | -0.3216446347 | O                        | -0.7831828255 | 3.3898942244  | 0.2154217130  |
| O                        | -2.1913942454 | 0.7421919443  | -1.6192788917 | O                        | -2.1397683217 | 1.4576325855  | -0.9236647580 |
| C                        | 1.5705196399  | 3.0432535814  | -0.5761601686 | C                        | 2.2248673355  | 2.6786101611  | -0.8073871284 |
| O                        | 0.9567711270  | 4.2874512341  | -0.3238253935 | O                        | 1.9909848424  | 4.0295619369  | -0.4804478696 |
| H                        | 1.5798107677  | 4.8868018630  | 0.0625018856  | H                        | 2.8104498143  | 4.4735662618  | -0.3130214536 |
| H                        | -1.2823215387 | 3.8054667346  | -0.2065856923 | H                        | -0.1503874259 | 4.0987856164  | 0.1832101306  |
| H                        | -0.3601938869 | 1.9299181757  | 0.8526749882  | H                        | 0.4497649664  | 1.9925674384  | 1.0569409652  |
| H                        | -1.6799772190 | 0.0580494285  | 0.2407964345  | H                        | -1.4302234394 | 0.5648942391  | 0.7723657794  |
| H                        | -0.3094645260 | -0.4196781841 | -2.1857121301 | H                        | -0.7572820413 | -0.0736361225 | -1.9290650786 |
| H                        | 0.1212559416  | 2.5325776802  | -2.0654399136 | H                        | 0.4016923758  | 2.5220760570  | -1.9185018854 |
| H                        | -2.6742788489 | 1.5484582564  | -1.4761192448 | H                        | -2.3668301147 | 2.3429372187  | -0.6621634192 |
| H                        | 1.9719694158  | 2.6104214244  | 0.3343950848  | H                        | 2.7164633724  | 2.1566791275  | 0.0074592811  |
| H                        | 2.3753882533  | 3.1434365339  | -1.2975003627 | H                        | 2.8413790769  | 2.5904693153  | -1.6957574316 |
| C                        | 0.7504121063  | -2.4195758784 | -1.2910055037 | C                        | -0.2989570027 | -2.4003465721 | -1.3022555343 |
| C                        | 0.8590638644  | -1.2535167055 | 0.8015892055  | C                        | 0.7510680492  | -1.5287904861 | 0.6282973795  |
| C                        | 1.3363962503  | -3.5697156314 | -0.6955322924 | C                        | 0.1624202318  | -3.6470382068 | -0.8983944386 |
| H                        | 0.4795649224  | -2.3822267478 | -2.3228374011 | H                        | -1.0362958581 | -2.2525557664 | -2.0608022865 |
| C                        | 1.6700578402  | -3.5475678026 | 0.6239751362  | C                        | 0.9225085392  | -3.7678464247 | 0.2483025919  |
| H                        | 1.5131549329  | -4.4393456957 | -1.2993248564 | H                        | -0.0700807014 | -4.5085361104 | -1.4971343607 |
| N                        | 0.4562750183  | -1.2923462092 | -0.5269924463 | N                        | -0.0287967775 | -1.2723159821 | -0.4706249131 |
| O                        | 0.6455969629  | -0.2126914150 | 1.4789326257  | O                        | 1.0521289857  | -0.4575885936 | 1.4144750292  |
| N                        | 1.4490530296  | -2.3447981999 | 1.3088253434  | N                        | 1.2013687497  | -2.6451437054 | 1.0230807575  |
| N                        | 2.3077336604  | -4.5351940385 | 1.3683673988  | N                        | 1.5513121377  | -4.9442482796 | 0.6801982123  |
| H                        | 1.9925493169  | -4.5581618055 | 2.3194190395  | H                        | 1.7137621445  | -4.9227203663 | 1.6658493603  |
| H                        | 2.2341175682  | -5.4427667609 | 0.9558656728  | H                        | 1.0430025994  | -5.7702847364 | 0.4388774911  |

**Table S9** Cartesian coordinates of anti-Cl<sub>S1/S0-P</sub> (left) and anti-Cl<sub>S1/S0-B</sub> (right) of cytidine optimized at SA3-CASSCF(14,12)/6-31G\* level

| SA3-CASSCF(14,12)/6-31G* |   |   |   | SA3-CASSCF(14,12)/6-31G* |   |   |   |
|--------------------------|---|---|---|--------------------------|---|---|---|
|                          | X | Y | Z |                          | X | Y | Z |

|   |               |               |               |   |               |               |               |
|---|---------------|---------------|---------------|---|---------------|---------------|---------------|
| C | 2.4532242064  | -1.2589279355 | -0.3694665591 | C | 0.8890895285  | 2.1064699114  | -0.9447253863 |
| C | 2.5589364089  | -0.0785150130 | 0.5944411809  | C | -0.2447126279 | 1.8676336648  | 0.0448979366  |
| C | 1.8621566834  | 1.0428398575  | -0.1849591239 | C | -1.0926503167 | 0.8597703264  | -0.7273837829 |
| C | 0.9444503263  | 0.2788428775  | -1.1596992310 | C | -0.0326135498 | 0.0433444696  | -1.4856515169 |
| O | 1.2043210873  | -1.0937944992 | -0.9884452515 | O | 1.1434489409  | 0.8179058151  | -1.4696838655 |
| O | 3.8723480300  | 0.2897895165  | 0.8965897840  | O | -0.9971292264 | 2.9971692648  | 0.3492986348  |
| O | 2.7779647676  | 1.7617064528  | -0.9603970566 | O | -1.8816646671 | 1.5112549032  | -1.6750329211 |
| C | 2.4938253115  | -2.6112510406 | 0.3070269325  | C | 2.1529596258  | 2.6843850675  | -0.3440108908 |
| O | 3.7131600558  | -2.6589636803 | 1.0128658027  | O | 1.7630397319  | 3.9088365266  | 0.2333945261  |
| H | 3.7798175520  | -3.4705489757 | 1.4961422907  | H | 2.5096702133  | 4.3414536950  | 0.6241832344  |
| H | 4.3248287877  | -0.4724965592 | 1.2388177834  | H | -0.4063508835 | 3.6975058661  | 0.6035898027  |
| H | 2.0034282803  | -0.2932808581 | 1.4965449583  | H | 0.1501105931  | 1.4027498115  | 0.9455202308  |
| H | 1.3087444506  | 1.7110318900  | 0.4599677673  | H | -1.6938146519 | 0.2349642687  | -0.0790582294 |
| H | 1.2306184286  | 0.5768758180  | -2.1579810220 | H | -0.3552576487 | -0.1179031446 | -2.5042603509 |
| H | 3.2552401299  | -1.1892994286 | -1.1003692860 | H | 0.5382499966  | 2.7540581465  | -1.7386768250 |
| H | 3.5962815403  | 1.8112116979  | -0.4796534703 | H | -2.2460974641 | 2.2922331737  | -1.2739533721 |
| H | 1.6466345155  | -2.6994238155 | 0.9797246123  | H | 2.5551412391  | 2.0117512725  | 0.4050999902  |
| H | 2.4368718183  | -3.4073264535 | -0.4288645736 | H | 2.9020255810  | 2.8326578207  | -1.1145748823 |
| C | -1.2883196313 | -0.0910279596 | -1.9418784347 | C | -0.6551627440 | -2.3085716425 | -1.0554610772 |
| C | -1.1773781668 | 0.2641154904  | 0.3989575305  | C | 1.4717368194  | -1.5484229352 | -0.3578756965 |
| C | -2.6347452349 | 0.5048048341  | -1.9376895664 | C | -0.2932576051 | -3.5057988549 | -0.2476053065 |
| H | -1.0855052578 | -1.1060316183 | -2.2432321994 | H | -1.6761329964 | -1.9727218495 | -1.0066454334 |
| C | -3.2192339027 | 0.6282919219  | -0.6721020054 | C | 0.9052065020  | -3.6268856662 | 0.3000692811  |
| H | -2.9010120168 | 1.2163078190  | -2.6996724197 | H | -1.0135142196 | -4.2999751338 | -0.1809604930 |
| N | -0.4729568913 | 0.5599503433  | -1.0773591090 | N | 0.2734412526  | -1.2243863288 | -0.8713175647 |
| O | -0.4339175791 | -0.0662656126 | 1.2690100729  | O | 2.4809467299  | -0.5066579676 | -0.4726615120 |
| N | -2.5066335567 | 0.3947388802  | 0.4276895720  | N | 1.8892342059  | -2.5673795566 | 0.1860603326  |
| N | -4.5064333905 | 1.0846327991  | -0.4825495530 | N | 1.4361671856  | -4.7364338465 | 0.9647022418  |
| H | -4.6468125084 | 1.6113722171  | 0.3521531004  | H | 2.0360096832  | -4.4620263801 | 1.7137949047  |
| H | -4.9596936343 | 1.4659002843  | -1.2830752161 | H | 0.7368212254  | -5.3688199479 | 1.2893885828  |

**Table S10** Cartesian coordinates of the north conformer (left) and south conformer (right) of cytidine optimized at SA3-CASSCF(14,12)/6-31G\* level.

| SA3-CASSCF(14,12)/6-31G* |               |              |               | SA3-CASSCF(14,12)/6-31G* |               |               |               |
|--------------------------|---------------|--------------|---------------|--------------------------|---------------|---------------|---------------|
|                          | X             | Y            | Z             |                          | X             | Y             | Z             |
| N                        | 1.6742852651  | 1.7656489137 | -2.4467725640 | N                        | 3.4519472775  | 0.4121906595  | -0.8638591672 |
| N                        | 0.4048038835  | 1.0062200041 | -0.5453124815 | N                        | 1.0946013664  | 0.1899739144  | -0.4720779934 |
| N                        | 3.7382660819  | 0.8818245241 | -2.9030302773 | N                        | 4.9685359365  | 0.0450533792  | 0.8184911160  |
| C                        | 0.4949632592  | 1.8105779421 | -1.6778439304 | C                        | 3.6625718845  | 0.1278676341  | 0.3735863868  |
| C                        | 1.4248633337  | 0.1662523792 | -0.1926897783 | C                        | 2.6022882600  | -0.1472086465 | 1.3156090294  |
| C                        | 2.5441535522  | 0.0968128666 | -0.9462947935 | C                        | 1.3404517028  | -0.0953023398 | 0.8420587832  |
| C                        | 2.6167089274  | 0.9558273636 | -2.1013776650 | C                        | 2.1669957851  | 0.4462370316  | -1.3726064333 |
| C                        | -0.8109272643 | 1.1588386424 | 0.2650569948  | C                        | -0.2636528992 | 0.2419917001  | -0.9665771480 |

|   |               |               |               |   |               |               |               |
|---|---------------|---------------|---------------|---|---------------|---------------|---------------|
| C | -2.0268223680 | 0.4510147326  | -0.3383567574 | C | -2.3780425497 | 0.6025582635  | -0.0776978808 |
| C | -2.0020853803 | -0.8889611938 | 0.3960943583  | C | -2.4457504349 | -0.6526068373 | -0.9637142219 |
| C | -1.5353312761 | -0.4528170426 | 1.7787038841  | C | -0.9893069126 | -1.1058713848 | -1.0020952714 |
| C | -0.9037598955 | -1.5231157654 | 2.6378817092  | C | -2.8141684471 | 0.3919486575  | 1.3580121958  |
| O | -0.4423402542 | 2.5399794453  | -1.9836334187 | O | 1.9445536020  | 0.6958437573  | -2.5503655652 |
| O | -0.6060506919 | 0.5783648738  | 1.5186125842  | O | -1.0325848490 | 1.0303015299  | -0.0991865470 |
| O | 0.1280056041  | -2.1563254703 | 1.9273275183  | O | -2.1244861940 | -0.7065339072 | 1.8932106528  |
| O | -3.2627652139 | -1.4984758442 | 0.4797188372  | O | -2.7883656001 | -0.3309272295 | -2.2903021490 |
| H | -0.5227271147 | -1.0626317610 | 3.5444872197  | H | 0.4762127197  | -0.2608891136 | 1.4511572705  |
| H | -1.6777519029 | -2.2348125578 | 2.9127892280  | H | 2.8088462247  | -0.3851943384 | 2.3400870051  |
| H | 0.5482618611  | -2.8008284202 | 2.4796354228  | H | 5.1264209318  | 0.3320243193  | 1.7597668173  |
| H | 3.3427841562  | -0.5731864223 | -0.6969484946 | H | 5.6285050618  | 0.4286623934  | 0.1761242417  |
| H | 1.2731122068  | -0.4188653500 | 0.6870908852  | H | -0.2199506604 | 0.6777826859  | -1.9496135818 |
| H | 3.8096196466  | 1.6327578737  | -3.5559211109 | H | -2.9982806973 | 1.3843318770  | -0.5054161766 |
| H | 4.5959857808  | 0.6871264872  | -2.4347104085 | H | -2.3625759175 | -0.8284092765 | 2.8019396763  |
| H | -1.0068520090 | 2.2119798040  | 0.3674685350  | H | -2.6021528680 | 1.2958201340  | 1.9207845789  |
| H | -1.2743094304 | -1.5579156478 | -0.0460558382 | H | -3.8887582446 | 0.2196432588  | 1.3800091878  |
| H | -2.3833570928 | -0.0465976669 | 2.3190988238  | H | -3.7142938728 | -0.1464979469 | -2.3656162586 |
| H | -1.9576703367 | 0.3668272757  | -1.4152359313 | H | -3.1095789928 | -1.4121515578 | -0.5692668637 |
| H | -3.3778660533 | -2.1086492502 | -0.2355003746 | H | -0.7687072609 | -1.6594435018 | -0.1015730634 |
| O | -3.1593242187 | 1.1736252219  | 0.0388837954  | O | -0.6552385883 | -1.9121209865 | -2.0740806744 |
| H | -3.8967334556 | 0.5762599427  | 0.077620928   | H | -1.0356549635 | -1.5452351291 | -2.8635796456 |

**Table S11** Cartesian coordinates of the most stable structure of Syn-Cyd (left) employing the PCM model and Syn-Cyd-H<sub>2</sub>O cluster (right) in the ground state optimized at DFT/B3LPY/6-31G\*\* level.

| DFT/B3LPY/6-31G** |                 |                 |                 | DFT/B3LPY/6-31G** |                 |                 |                 |
|-------------------|-----------------|-----------------|-----------------|-------------------|-----------------|-----------------|-----------------|
|                   | X               | Y               | Z               |                   | X               | Y               | Z               |
| C                 | 0.466893000000  | -1.857091000000 | -2.241032000000 | C                 | 0.000000000000  | 0.000000000000  | 0.000000000000  |
| C                 | 0.647605000000  | -2.780456000000 | -1.021679000000 | C                 | 0.000000000000  | 0.000000000000  | 1.536170000000  |
| C                 | 0.621376000000  | -1.812103000000 | 0.176215000000  | C                 | 1.488850300000  | 0.000000000000  | 1.883247200000  |
| C                 | 1.266205000000  | -0.555942000000 | -0.452620000000 | C                 | 2.050858900000  | -0.810667900000 | 0.712382200000  |
| O                 | 0.853822000000  | -0.525179000000 | -1.804175000000 | O                 | 1.282317100000  | -0.470591500000 | -0.393026900000 |
| O                 | 1.948171000000  | -3.380386000000 | -0.993909000000 | O                 | -0.521155400000 | -1.203696400000 | 2.058098000000  |
| O                 | 1.312516000000  | -2.292292000000 | 1.304918000000  | O                 | 1.794462600000  | -0.553360900000 | 3.117974000000  |
| C                 | -0.957526000000 | -1.796435000000 | -2.783529000000 | C                 | -0.252328100000 | 1.362825700000  | -0.621486700000 |
| O                 | -1.928178000000 | -1.593001000000 | -1.773243000000 | O                 | 0.482169900000  | 2.378429500000  | -0.019826100000 |
| H                 | -1.687303000000 | -0.772078000000 | -1.288253000000 | H                 | 1.407344800000  | 2.246606900000  | -0.181787900000 |
| H                 | 1.914970000000  | -4.222565000000 | -1.472836000000 | H                 | -1.463071200000 | -1.199758200000 | 2.031840100000  |
| H                 | -0.135701000000 | -3.540419000000 | -0.955438000000 | H                 | -0.519928900000 | 0.855006300000  | 1.949333600000  |
| H                 | -0.407431000000 | -1.595993000000 | 0.460503000000  | H                 | 1.867195600000  | 1.008075300000  | 1.856438100000  |
| H                 | 2.355971000000  | -0.666249000000 | -0.384820000000 | H                 | 1.926366100000  | -1.862232000000 | 0.946685700000  |
| H                 | 1.152925000000  | -2.163407000000 | -3.040788000000 | H                 | -0.744683500000 | -0.701718900000 | -0.366472000000 |
| H                 | 2.007498000000  | -2.874842000000 | 0.941677000000  | H                 | 1.139435600000  | -1.203929300000 | 3.322431500000  |

|   |                 |                 |                 |   |                 |                 |                 |
|---|-----------------|-----------------|-----------------|---|-----------------|-----------------|-----------------|
| H | -0.998478000000 | -1.010962000000 | -3.555464000000 | H | -0.053074800000 | 1.295396500000  | -1.688815600000 |
| H | -1.190770000000 | -2.751769000000 | -3.268577000000 | H | -1.301720900000 | 1.613101100000  | -0.497029400000 |
| C | 1.999419000000  | 1.485405000000  | 0.659114000000  | C | 4.285989200000  | -1.734269100000 | 0.477900200000  |
| C | -0.377453000000 | 1.195653000000  | 0.326612000000  | C | 3.978162600000  | 0.600229500000  | 0.045989500000  |
| C | 1.796932000000  | 2.674601000000  | 1.278066000000  | C | 5.602690800000  | -1.644794700000 | 0.206527500000  |
| H | 2.992310000000  | 1.078310000000  | 0.503816000000  | H | 3.802315000000  | -2.671418000000 | 0.665960100000  |
| C | 0.435435000000  | 3.100043000000  | 1.412954000000  | C | 6.101582700000  | -0.342313900000 | -0.163081800000 |
| H | 2.626512000000  | 3.266281000000  | 1.642812000000  | H | 6.242149700000  | -2.504149400000 | 0.243657300000  |
| N | 0.960152000000  | 0.723997000000  | 0.194838000000  | N | 3.464700600000  | -0.638086900000 | 0.421494800000  |
| O | -1.318882000000 | 0.516921000000  | -0.113115000000 | O | 3.262857300000  | 1.594014600000  | -0.025805200000 |
| N | -0.586172000000 | 2.382733000000  | 0.948454000000  | N | 5.352237200000  | 0.703865900000  | -0.239366200000 |
| N | 0.147589000000  | 4.264877000000  | 2.023931000000  | N | 7.431355100000  | -0.218149100000 | -0.483948700000 |
| H | -0.817203000000 | 4.552843000000  | 2.105466000000  | H | 7.750784100000  | 0.722097000000  | -0.553109400000 |
| H | 0.866308000000  | 4.865325000000  | 2.398606000000  | H | 8.063896100000  | -0.836005800000 | -0.029855200000 |
|   |                 |                 |                 | O | 2.201956700000  | 3.563761500000  | -0.208160300000 |
|   |                 |                 |                 | H | 3.022106400000  | 3.089162000000  | -0.054180300000 |
|   |                 |                 |                 | H | 2.375469100000  | 4.507872900000  | -0.220289600000 |
